# Supplementary material for: Selective recognition of tetrahedral dianions by a hexaaza cryptand receptor
Source: Royal Society of Chemistry journal article supplement (doi:10.1039/b912940e), 2009-01-01
Supplement: b912940e.pdf [file b912940e.pdf]

## Supplementary Information

### Selective Recognition of Tetrahedral Dianions by a Hexaaza Cryptand Receptor

Pedro Mateus,<sup>a</sup> Rita Delgado,<sup>a,b\*</sup> Paula Brandão,<sup>c</sup> Sílvia Carvalho<sup>d</sup> and Vítor Félix<sup>d</sup>

<sup>a</sup>Instituto de Tecnologia Química e Biológica, UNL, Av. da República – EAN, 2780–157 Oeiras, Portugal. Fax: (+351) 21 441 12 77, e-mail: delgado@itqb.unl.pt. <sup>b</sup>Instituto Superior Técnico, DEQB, Av. Rovisco Pais, 1049–001 Lisboa, Portugal. <sup>c</sup>Departamento de Química, CICECO, Universidade de Aveiro, 3810–193 Aveiro, Portugal, <sup>d</sup>Departamento de Química, CICECO and Secção Autónoma de Ciências da Saúde, Universidade de Aveiro, 3810–193 Aveiro, Portugal.

| Contents: Figures and Tables not shown in the main text |                                                                                                                                                                                                                                                                                                                                                                                                        | Page |
|---------------------------------------------------------|--------------------------------------------------------------------------------------------------------------------------------------------------------------------------------------------------------------------------------------------------------------------------------------------------------------------------------------------------------------------------------------------------------|------|
| <b>Fig. S1</b>                                          | <sup>1</sup> H and <sup>13</sup> C NMR spectra of the hexamine in CDCl <sub>3</sub> .                                                                                                                                                                                                                                                                                                                  | S2   |
| <b>Fig. S2</b>                                          | HMQC spectra of the hexamine in CDCl <sub>3</sub> .                                                                                                                                                                                                                                                                                                                                                    | S2   |
| <b>Fig. S3</b>                                          | <sup>1</sup> H and <sup>13</sup> C NMR spectra of xyl in CDCl <sub>3</sub> .                                                                                                                                                                                                                                                                                                                           | S3   |
| <b>Fig. S4</b>                                          | COSY spectra of xyl in CDCl <sub>3</sub> .                                                                                                                                                                                                                                                                                                                                                             | S3   |
| <b>Fig. S5</b>                                          | HMQC spectra of xyl in CDCl <sub>3</sub> .                                                                                                                                                                                                                                                                                                                                                             | S4   |
| <b>Fig. S6</b>                                          | NOESY spectra of xyl in CDCl <sub>3</sub> .                                                                                                                                                                                                                                                                                                                                                            | S4   |
| <b>Fig. S7</b>                                          | ESI mass spectra of xyl in MeOH.                                                                                                                                                                                                                                                                                                                                                                       | S5   |
| <b>Fig. S8</b>                                          | <sup>1</sup> H NMR spectra of solutions of the H <sub>6</sub> xyl(TsO) <sub>6</sub> receptor (A) and of the receptor with each anionic substrate in equimolar amounts, Cl <sup>-</sup> (B), NO <sub>3</sub> <sup>-</sup> (C), AcO <sup>-</sup> (D), H <sub>2</sub> PO <sub>4</sub> <sup>-</sup> (E) and SO <sub>4</sub> <sup>2-</sup> (F), respectively, in D <sub>2</sub> O at pD = 3.80 and 298.2 K. | S5   |
| <b>Fig. S9</b>                                          | ESI mass spectra of a solution of 1:1 receptor to sulfate stoichiometry in H <sub>2</sub> O/MeOH (50:50 v/v) at pH = 3.80.                                                                                                                                                                                                                                                                             | S5   |
| <b>Fig. S10</b>                                         | ESI mass spectra of a solution of 1:1:1 receptor/sulfate/nitrate stoichiometry in H <sub>2</sub> O/MeOH (50:50 v/v) at pH = 3.80.                                                                                                                                                                                                                                                                      | S6   |
| <b>Fig. S11</b>                                         | Evolution of the six S...N distances over 15 ns long simulation                                                                                                                                                                                                                                                                                                                                        | S6   |
| <b>Fig. S12</b>                                         | Rdfs for O–H...C <sub>N</sub> and O–H...Cl distances between the water (blue) and methanol (in red) molecules and the centre of mass of the receptor (left) and the anion (right). The Rdfs were calculated over the 15 ns of simulation.                                                                                                                                                              | S6   |
| <b>Table S1</b>                                         | Stepwise protonation ( $K_i^H$ ) constants of the anions in H <sub>2</sub> O/MeOH                                                                                                                                                                                                                                                                                                                      | S7   |

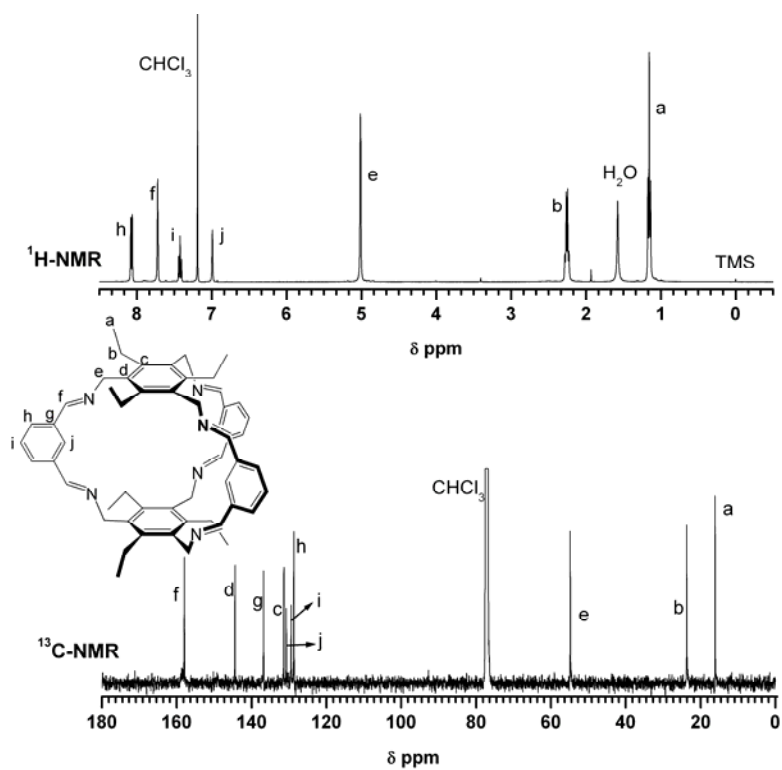

Fig. S1 <sup>1</sup>H and <sup>13</sup>C NMR spectra of the hexamine in CDCl<sub>3</sub>.

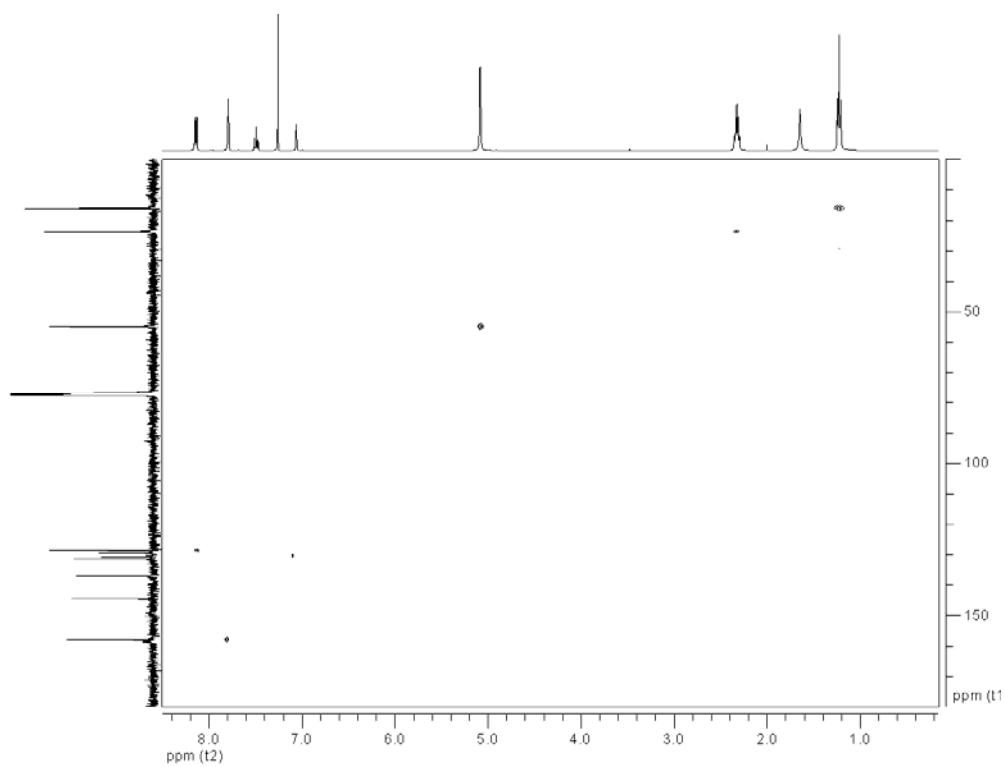

Fig. S2 HMQC spectra of the hexamine in CDCl<sub>3</sub>.

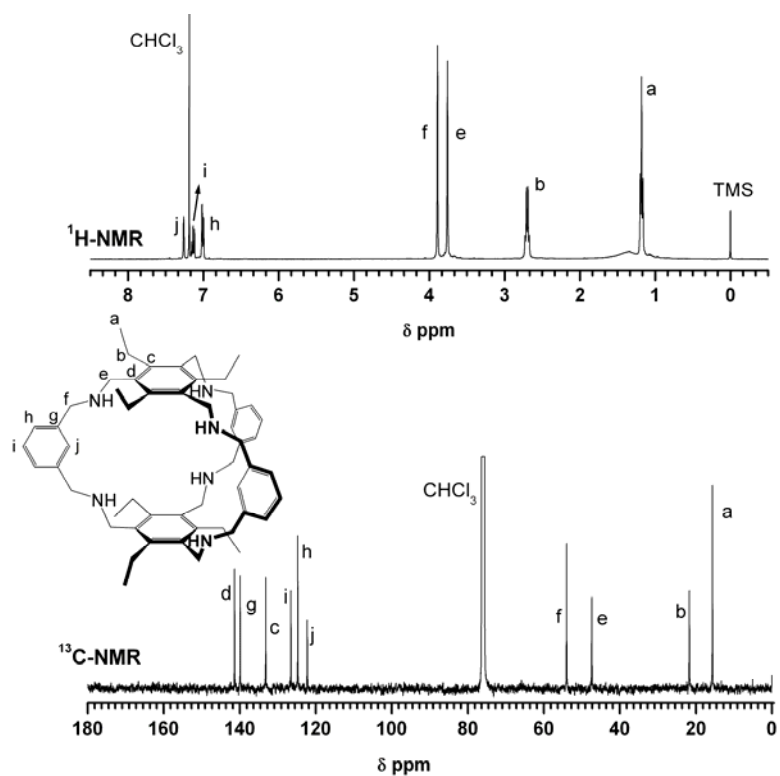

**Fig. S3**  $^1\text{H}$  and  $^{13}\text{C}$  NMR spectra of xyl in  $\text{CDCl}_3$ .

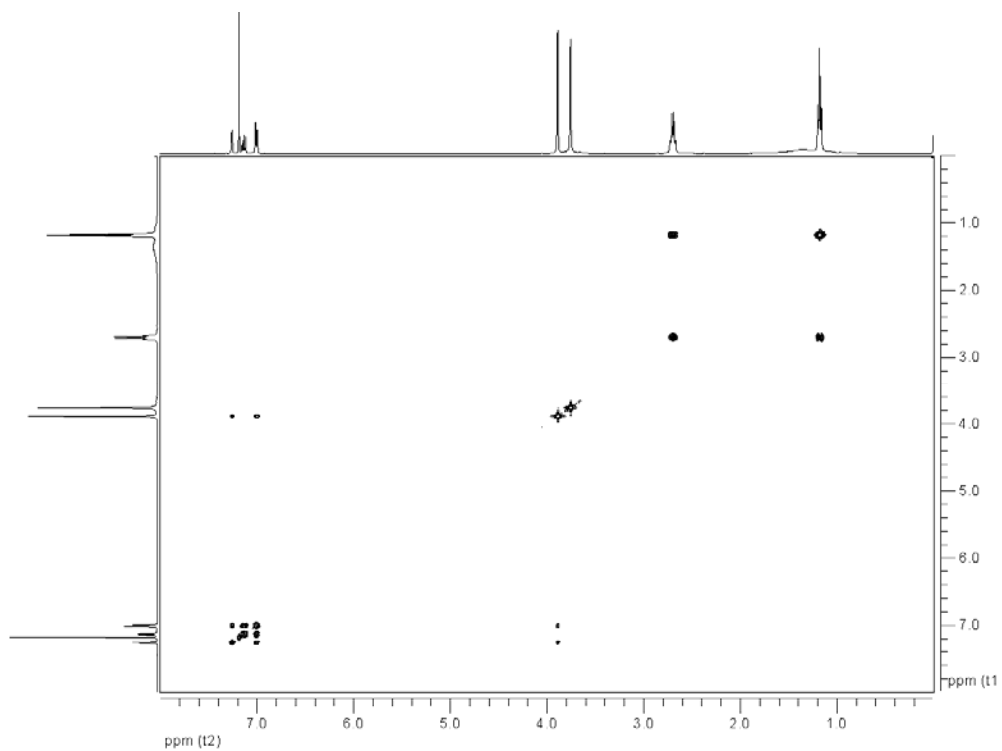

**Fig. S4** COSY spectra of xyl in  $\text{CDCl}_3$ .

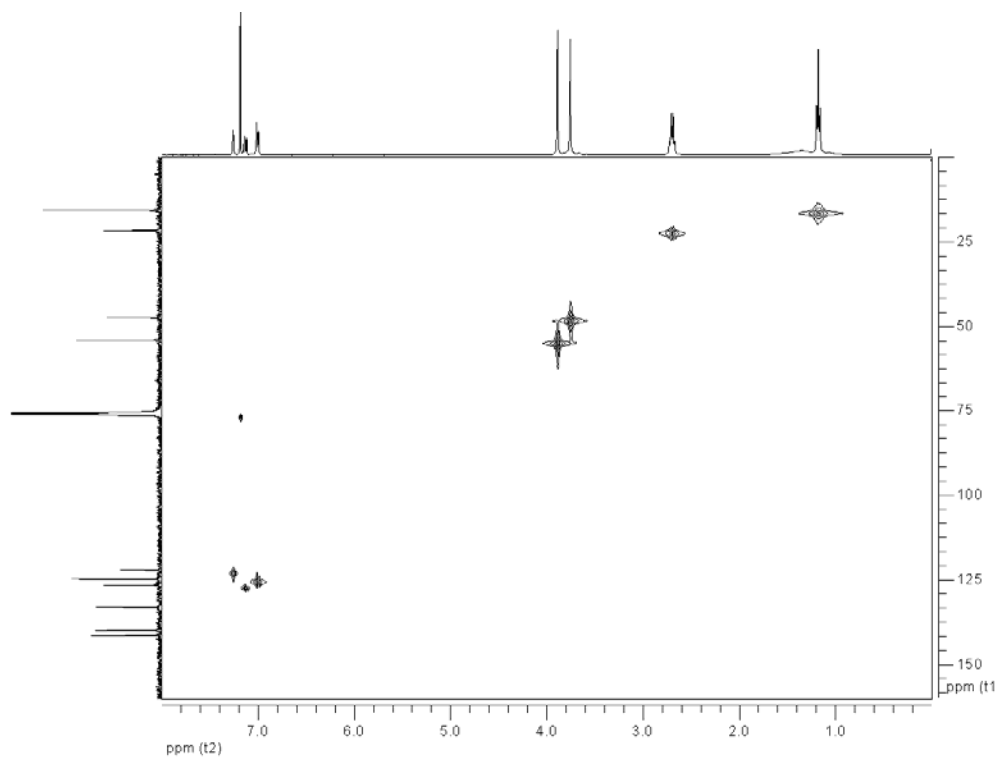

**Fig. S5** HMQC spectra of xyl in  $\text{CDCl}_3$ .

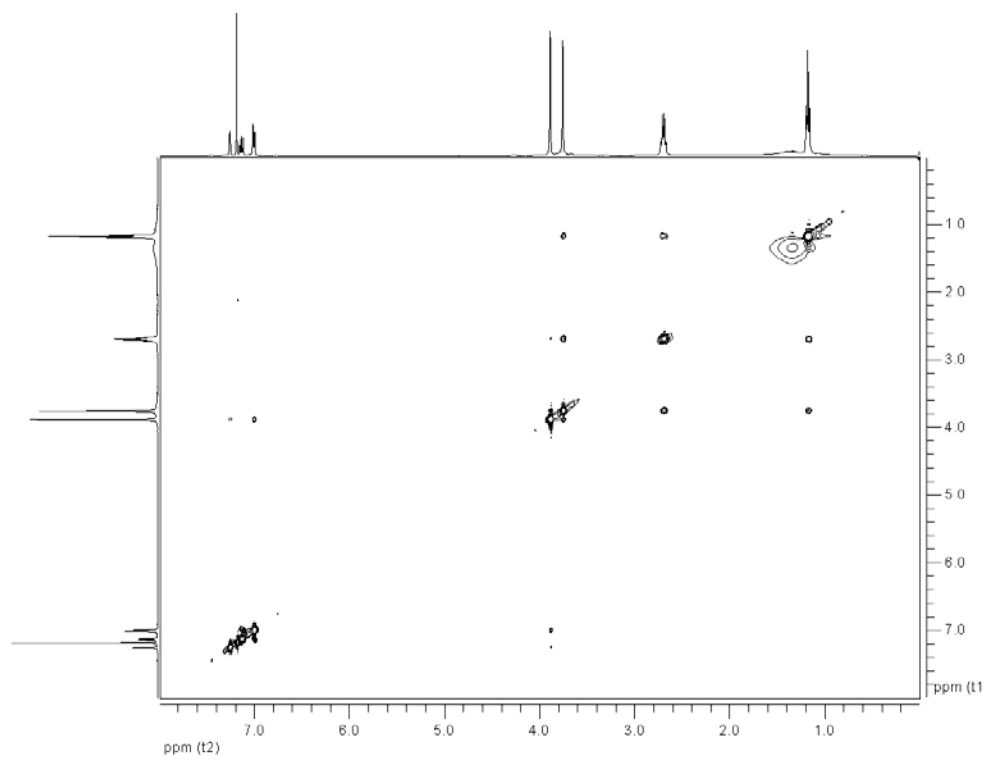

**Fig. S6** NOESY spectra of xyl in  $\text{CDCl}_3$ .

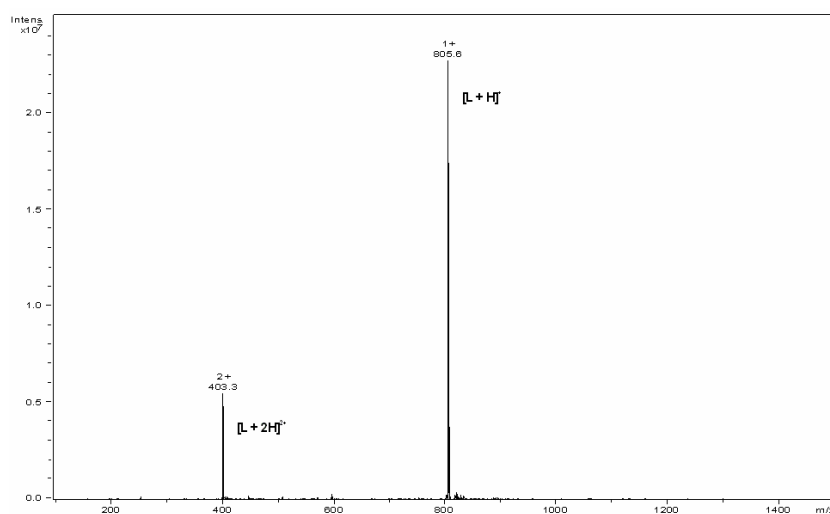

**Fig. S7** ESI mass spectra of xyl in MeOH.

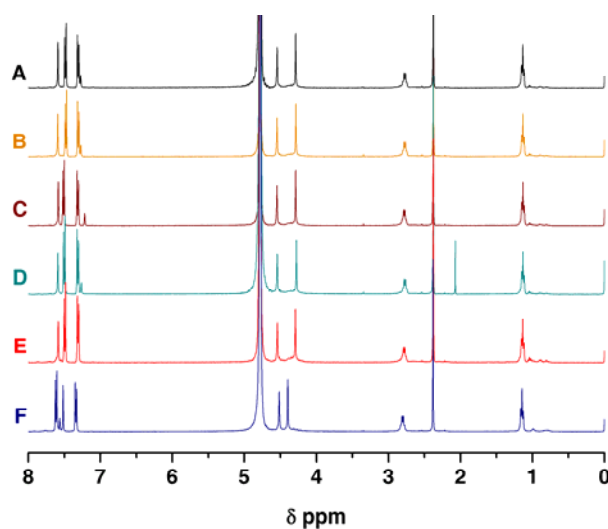

**Fig. S8**  $^1\text{H}$  NMR spectra of solutions of the  $\text{H}_6\text{xyl}(\text{TsO})_6$  receptor (A) and of the receptor with each anionic substrate in equimolar amounts,  $\text{Cl}^-$  (B),  $\text{NO}_3^-$  (C),  $\text{AcO}^-$  (D),  $\text{H}_2\text{PO}_4^-$  (E) and  $\text{SO}_4^{2-}$  (F), respectively, in  $\text{D}_2\text{O}$  at  $\text{pD} = 3.80$  and  $298.2\text{ K}$ .

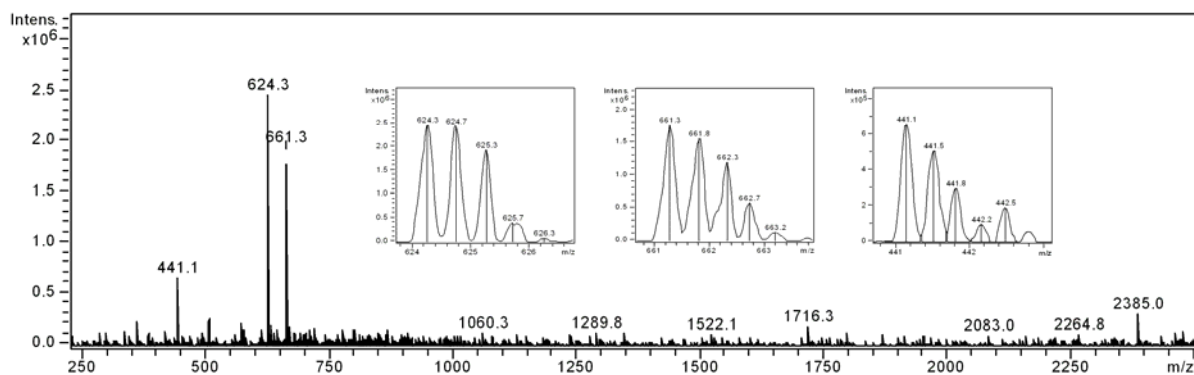

**Fig. S9** ESI mass spectra of a solution of 1:1 receptor to sulfate stoichiometry in  $\text{H}_2\text{O}/\text{MeOH}$  (50:50 v/v) at  $\text{pH} = 3.80$ .

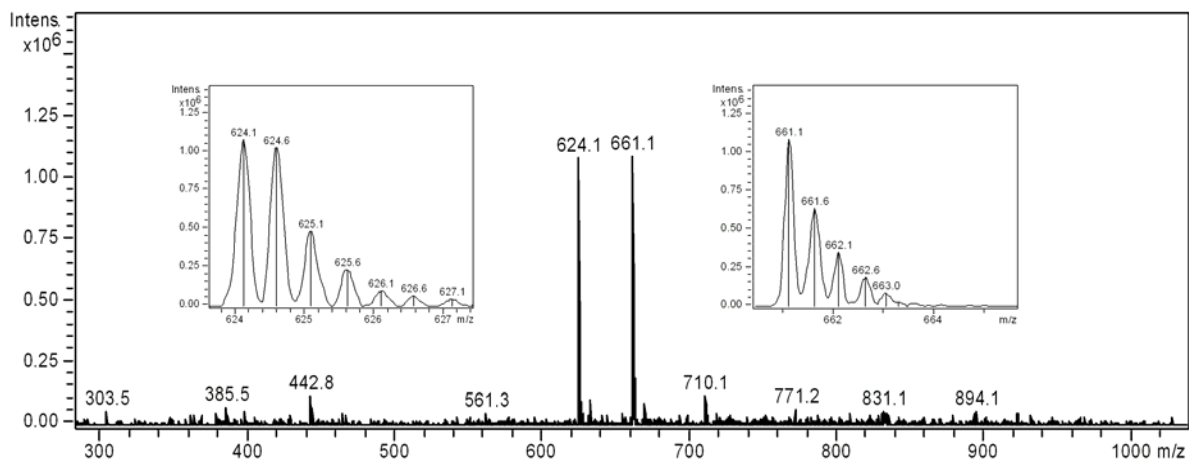

**Fig. S10** ESI mass spectra of a solution of 1:1:1 receptor/sulfate/nitrate stoichiometry in  $\text{H}_2\text{O}/\text{MeOH}$  (50:50 v/v) at  $\text{pH} = 3.80$ .

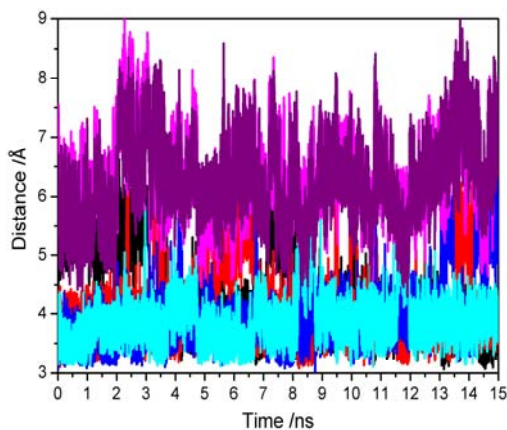

**Fig. S11** Evolution of the six  $\text{S}\cdots\text{N}$  distances over 15 ns long simulation

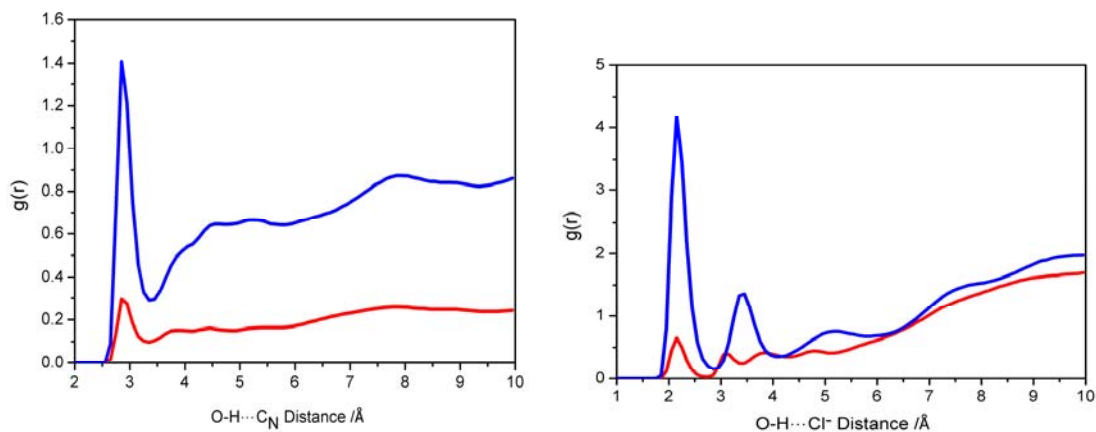

**Fig. S12** Rdfs for  $\text{O-H}\cdots\text{C}_\text{N}$  and  $\text{O-H}\cdots\text{Cl}$  distances between the water (blue) and methanol (in red) molecules and the centre of mass of the receptor (left) and the anion (right). The Rdfs were calculated over the 15 ns of simulation.

**Table S1** Stepwise protonation ( $\log K_i^H$ ) constants of the anions in H<sub>2</sub>O/MeOH (50:50 v/v);  $T = 298.2 \pm 0.1$  K;  $I = 0.10 \pm 0.01$  mol dm<sup>-3</sup> in KTso.

| Equilibrium quotient <sup>[a]</sup>      | SO <sub>4</sub> <sup>2-</sup> | SeO <sub>4</sub> <sup>2-</sup> | S <sub>2</sub> O <sub>3</sub> <sup>2-</sup> | AcO <sup>-</sup> | PO <sub>4</sub> <sup>3-</sup> |
|------------------------------------------|-------------------------------|--------------------------------|---------------------------------------------|------------------|-------------------------------|
| [HA]/[A][H]                              | 2.51(1)                       | 2.36(1)                        | 2.04(1)                                     | 5.28(1)          | n.d. <sup>[b]</sup>           |
| [H <sub>2</sub> A]/[HA][H]               | –                             | –                              | –                                           | –                | 7.46(1)                       |
| [H <sub>3</sub> A]/[H <sub>2</sub> A][H] | –                             | –                              | –                                           | –                | 2.82(1)                       |

[a] A is the anion. [b] Too high to be accurately determined by potentiometry
